# Supplementary material for: Genetic Diversity and Population Structure of Cowpea (Vigna unguiculata L. Walp)
Source: PLoS One. 2016 Aug 10;11(8):e0160941. doi: 10.1371/journal.pone.0160941 (PMC4980000; doi:10.1371/journal.pone.0160941)
Supplement: S1 Table — (XLSX) [file pone.0160941.s001.xlsx]

## Sheet: S1_Table
S1 Table. Cowpea accession, name, region, country, location collected, and cluster assigned in this study.
Accession number	Name	Region	Country	Lociation collected	Cluster1
01-1781	01-1781	American Cultivar	US	AR	Q2
07-303	07-303	American Cultivar	US	AR	Q1
09-105	09-105	American Cultivar	US	AR	Q1
09-1090	09-1090	American Cultivar	US	AR	Q1
09-175	09-175	American Cultivar	US	AR	Q1
09-181	09-181	American Cultivar	US	AR	Q1
09-204	09-204	American Cultivar	US	AR	Q1
09-208	09-208	American Cultivar	US	AR	Q2
09-211	09-211	American Cultivar	US	AR	Q1
09-231	09-231	American Cultivar	US	AR	Q2
09-239	09-239	American Cultivar	US	AR	Q1
09-268	09-268	American Cultivar	US	AR	Q1
09-295	09-295	American Cultivar	US	AR	Q2
09-296	09-296	American Cultivar	US	AR	Q2
09-307	09-307	American Cultivar	US	AR	Q2
09-316	09-316	American Cultivar	US	AR	Q2
09-323	09-323	American Cultivar	US	AR	Q1
09-393	09-393	American Cultivar	US	AR	Q2
09-452	09-452	American Cultivar	US	AR	Q2
09-455	09-455	American Cultivar	US	AR	Q1
09-462	09-462	American Cultivar	US	AR	Q1
09-470	09-470	American Cultivar	US	AR	Q2
09-481	09-481	American Cultivar	US	AR	Q2
09-529	09-529	American Cultivar	US	AR	Q1
09-534	09-534	American Cultivar	US	AR	Q2
09-535	09-535	American Cultivar	US	AR	Q2
09-580	09-580	American Cultivar	US	AR	Q1
09-655	09-655	American Cultivar	US	AR	Q2
09-671	09-671	American Cultivar	US	AR	Q1
09-686	09-686	American Cultivar	US	AR	Q1
09-692	09-692	American Cultivar	US	AR	Q1Q2
09-693	09-693	American Cultivar	US	AR	Q2
09-697	09-697	American Cultivar	US	AR	Q2
09-702	09-702	American Cultivar	US	AR	Q2
09-714	09-714	American Cultivar	US	AR	Q1
09-744	09-744	American Cultivar	US	AR	Q2
09-745	09-745	American Cultivar	US	AR	Q2
09-749	09-749	American Cultivar	US	AR	Q2
AR_BE_#1	AR_BE_#1	American Cultivar	US	AR	Q1
AR95-348	AR95-348	American Cultivar	US	AR	Q1
EARLY_ACRE	EARLY_ACRE	American Cultivar	US	AR	Q1
EARLY_SCARL	EARLY_SCARL	American Cultivar	US	AR	Q1
EBONY	EBONY	American Cultivar	US	AR	Q1Q2Q3
ELEGANCE	ELEGANCE	American Cultivar	US	AR	Q2
EMPIRE	EMPIRE	American Cultivar	US	AR	Q1
EMPRESS	EMPRESS	American Cultivar	US	AR	Q1
ENCORE	ENCORE	American Cultivar	US	AR	Q1
Envoy	Envoy	American Cultivar	US	AR	Q1
EPOCH	EPOCH	American Cultivar	US	AR	Q2
ERECT_SET	ERECT_SET	American Cultivar	US	AR	Q2
EXCEL	EXCEL	American Cultivar	US	AR	Q2
EXCEL_SELEC	EXCEL_SELEC	American Cultivar	US	AR	Q2
PI115679	HODI	East Asia	Sri Lanka		Q1
PI115683	POLON LEEMA	East Asia	Sri Lanka		Q2
PI121433	4696	Latin America	Paraguay		Q1
PI141355	TVu 1520	Latin America	Guatemala		Q3
PI142779	CUARENTANA	Latin America	Mexico	Chiapas	Q3
PI145198	BRABHAM	North America	US	TX	Q3
PI146618	TVu 1411	Latin America	Brazil	Rondonia	Q2
PI147076	TVu 1773	Latin America	Brazil	Rondonia	Q3
PI147077	TVu 1807	Latin America	Brazil	Amazonas	Q3
PI147561	TVu 2267	Latin America	Colombia		Q1
PI147562	TVu 1940	Latin America	Colombia		Q1
PI147563	TVu 1412	Latin America	Colombia		Q3
PI148674	TVu 1522	Central West Asia	Iran	Tehran	Q3
PI148678	TVu 1941	Central West Asia	Iran		Q2
PI148681	TVu 2272	Central West Asia	Iran	Tehran	Q1
PI152194	TAPE	Latin America	Paraguay		Q3
PI152195	PYTA	Latin America	Paraguay		Q3
PI152196	SAN FRANCISCO	Latin America	Paraguay		Q1
PI152197	TUPI PYTA	Latin America	Paraguay		Q1
PI152199	TVu 1973	Latin America	Paraguay		Q3
PI154134	BOCANEGRA	Latin America	Peru	Piura	Q1Q2Q3
PI162924	XAPE 3443 II L8	Latin America	Paraguay		Q1
PI162925	TVu 1944	Latin America	Paraguay		Q1
PI163142	KOR	India	India	Punjab	Q3
PI163143	LOBIA	India	India		Q1
PI163448	CHINEGRO	Latin America	Costa Rica		Q2
PI164337	TATOPAYARU	India	India		Q1Q2
PI164641	TVu 1525	India	India	Bangalore Mysore	Q3
PI164979	TVu 2287	Central West Asia	Turkey	Istanbul Province	Q1
PI165486	LOBRA	India	India	Uttar Pradesh	Q1
PI166146	TVu 2291	India	India		Q3
PI167024	BORULCE	Central West Asia	Turkey	Hatay	Q2
PI170844	TVu 1527	Central West Asia	Turkey		Q3
PI170857	TVu 2295	Central West Asia	Turkey		Q2Q3
PI170859	UCR 136	Central West Asia	Turkey		Q2
PI170861	TVu 1528	Central West Asia	Turkey		Q3
PI170863	TVu 1810	Central West Asia	Turkey		Q2
PI170865	TVu 1529	Central West Asia	Turkey		Q3
PI170867	KARAGOZ	Central West Asia	Turkey		Q2
PI170868	TVu 1530	Central West Asia	Turkey		Q3
PI170869	3151	Central West Asia	Turkey		Q2
PI171891	6580	Central West Asia	Turkey		Q2
PI174411	TVu 2308	Central West Asia	Turkey		Q1
PI175327	LOBIA	India	India	Uttar Pradesh	Q2
PI175332	RONGI	India	India	Uttar Pradesh	Q2
PI175959	TVu 1536	Central West Asia	Turkey		Q1
PI175962	TVu 2312	Central West Asia	Turkey		Q2
PI175963	6097	Central West Asia	Turkey		Q1
PI176796	TVu 1537	Central West Asia	Turkey		Q2
PI177101	TVu 1538	Central West Asia	Turkey		Q2
PI177578	TVu 1539	Central West Asia	Turkey		Q3
PI177579	TVu 1540	Central West Asia	Turkey		Q1
PI179124	9681	Central West Asia	Turkey		Q2
PI179126	TVu 2319	Central West Asia	Turkey		Q1
PI179553	TVu 2320	Central West Asia	Turkey		Q1
PI179554	TVu 2321	Central West Asia	Turkey		Q2
PI179555	TVu 2322	Central West Asia	Turkey		Q1
PI181833	TVu 1544	Central West Asia	Lebanon		Q1
PI183250	TVu 2328	Central East Africa	Egypt		Q2
PI183251	TVu 2329	Central East Africa	Egypt		Q1
PI183363	JURUNGA	India	India	Barmakot Bastar State	Q1
PI183482	CHAULA	India	India	Surat Bombay	Q1
PI184952	TVu 1547	West Africa	Ghana	Kokoansi	Q1
PI184953	TVu 1548	West Africa	Ghana	Kokoansi	Q2
PI185647	TVu 1549	West Africa	Ghana	Kumasi	Q3
PI186360	TVu 1550	Oceania	Australia	Capital Terr	Q3
PI186386	NEW ERA	Latin America	Uruguay		Q2
PI186452	TVu 1947	West Africa	Nigeria	Ijoko	Q2
PI186458	TVu 1949	West Africa	Nigeria	Lagos	Q2
PI186459	TVu 1690	West Africa	Nigeria	Lagos	Q2
PI186460	TVu 1551	West Africa	Nigeria	Lagos	Q1
PI186465	TVu 1950	West Africa	Nigeria	Lagos	Q1
PI186466	TVu 1691	West Africa	Nigeria	Lagos	Q1
PI186467	TVu 1552	West Africa	Nigeria		Q1
PI188701	TVu 1554	West Africa	Nigeria	Lagos	Q3
PI188704	TVu 1455	West Africa	Nigeria	Lagos	Q1
PI189230	TVu 1881	Central East Africa	Congo		Q2
PI189374	TVu 2200	West Africa	Nigeria	Gbongan	Q2
PI189375	TVu 1738	West Africa	Nigeria	Benin City	Q1
PI189378	TVu 1692	West Africa	Nigeria	Benin City	Q1
PI189416	51-50	Latin America	Guatemala	Escuintla	Q3
PI190191	TVu 2355	Latin America	Mexico	Veracruz	Q1
PI194203	R 33	North America	US	MD	Q1
PI194204	R 35	North America	US	MD	Q1Q2
PI194206	R 43	North America	US	MD	Q1Q3
PI194207	R 49	North America	US	MD	Q1Q2
PI194208	R 53	North America	US	MD	Q3
PI194209	R 55	North America	US	MD	Q1
PI194210	R 57	North America	US	MD	Q3
PI194211	R 63	North America	US	MD	Q1Q3
PI194212	R 65	North America	US	MD	Q1
PI194213	R 67	North America	US	MD	Q3
PI194214	R 69	North America	US	MD	Q3
PI194215	R 71	North America	US	MD	Q1
PI196301	2925	Latin America	Nicaragua		Q3
PI197056	FRIJOL DE CASTILLA	Latin America	El Salvador		Q1
PI197057	TVu 1695	Latin America	Honduras		Q1
PI200867	TVu 1975	East Asia	Myanmar	BazaarZegyo	Q1
PI201024	TVu 2372	Latin America	Guatemala		Q1Q2Q3
PI201498	7124	Latin America	Mexico	Tabasco	Q1
PI202802	TVu 2373	Latin America	Peru		Q1
PI205139	PI205139	India	India	Delhi	Q2
PI205141	TVu 1567	India	India	Delhi	Q1
PI205240	PI205240	Central West Asia	Turkey	Mugla	Q2
PI205241	TVu 1414	Central West Asia	Turkey	Izmir	Q1
PI208771	TVu 1696	Latin America	Cuba		Q1
PI209971	TURU NASHI WASE SASAGE	East Asia	Japan		Q1
PI211109	TVu 1569	Central West Asia	Afghanistan	Kandahar	Q1
PI211110	TVu 1648	Central West Asia	Afghanistan	Kandahar	Q2
PI211641	TVu 1817	Central West Asia	Afghanistan	Farah	Q1
PI211642	TVu 1649	Central West Asia	Afghanistan	Helmand	Q1
PI211753	TVu 1818	Central West Asia	Afghanistan	Balkh	Q1
PI211754	TVu 2381	Central West Asia	Afghanistan	Balkh	Q1
PI211755	TVu 2382	Central West Asia	Afghanistan	Herat	Q2
PI211756	TVu 1819	Central West Asia	Afghanistan	Herat	Q1
PI212635	TVu 2383	Central West Asia	Afghanistan	Nangarhar	Q2
PI212928	CHARELA	India	India		Q2
PI214069	TVu 1820	India	India		Q1
PI214352	13590	India	India		Q1
PI214353	13679	India	India		Q1
PI214354	LOBIA	India	India	Punjab	Q3
PI215659	PHILIPPINE EARLY	India	India	Karnataka	Q3
PI218123	LUBIA	Central West Asia	Pakistan		Q2
PI220209	LOBIA	Central West Asia	Afghanistan	Helmand	Q1
PI220847	LOBIA-I-SEFADE	Central West Asia	Afghanistan	Kandahar	Q1
PI220848	LOBIA-I-SEFADE	Central West Asia	Afghanistan	Kondoz	Q2
PI220849	LOBIA-I-SURKH	Central West Asia	Afghanistan	Kondoz	Q2
PI220850	LOBIA-I-SAFADE	Central West Asia	Afghanistan	Balkh	Q2
PI220851	LOBIA-I-SAFADE	Central West Asia	Afghanistan	Herat	Q2
PI221729	TVu 2011	South Africa	South Africa	Transvaal	Q1
PI221730	TVu 1928	South Africa	South Africa	Transvaal	Q1
PI221731	TVu 2396	South Africa	South Africa	Transvaal	Q1
PI221732	TVu 1913	South Africa	South Africa	Transvaal	Q1
PI222755	LOBIA-CHESHBOLBOLI	Central West Asia	Iran		Q2
PI222756	LOBIA	Central West Asia	Iran		Q2
PI223023	LOBIA-CHESHBOLBOLI	Central West Asia	Iran		Q2
PI225921	TVu 1457	Central East Africa	Kenya		Q2
PI225922	TVu 1977	South Africa	Zambia		Q2
PI227396	LUBIA	Central West Asia	Iran		Q1
PI227397	LUBIA	Central West Asia	Iran		Q2
PI227827	TVu 1576	Latin America	Guatemala		Q3
PI227829	TVu 1953	Latin America	Guatemala		Q3
PI227830	TVu 1577	Latin America	Guatemala		Q1
PI227831	TVu 1578	Latin America	Guatemala		Q2
PI229551	TVu 2412	Central West Asia	Iran		Q2
PI229734	CHESH BOLBOLI LUBI	Central West Asia	Iran		Q1
PI229735	LUBIA	Central West Asia	Iran		Q2
PI229796	TVu 1654	Central West Asia	Iran		Q2
PI244571	TIQUISATE	Latin America	Guatemala		Q1
PI250238	K522	Central West Asia	Pakistan	North-WestFrontier	Q2
PI250416	TVu 2417	Central West Asia	Pakistan		Q2
PI250587	TVu 2418	Central East Africa	Egypt		Q1
PI251222	TVu 1656	Central West Asia	Afghanistan	Helmand	Q2
PI255765	TVu 1703	West Africa	Nigeria		Q1
PI255774	TVu 2428	West Africa	Nigeria		Q1
PI255782	TVu 1956	West Africa	Nigeria		Q1
PI255788	TVu 1584	West Africa	Nigeria		Q1
PI255815	TVu 1459	West Africa	Nigeria		Q2
PI256341	TVu 1831	Central West Asia	Pakistan	Herat	Q2
PI256342	UCR 17	Central West Asia	Pakistan	Herat	Q2
PI257463	TVu 1930	South Africa	South Africa		Q1
PI259759	PI259759	East Asia	China		Q1
PI262179	TVu 2443	Europe	Portugal	Porto	Q1
PI270065	RAMBO	Europe	Portugal		Q1
PI271256	TVu 2013	India	India		Q2
PI277784	BRABHAM	Oceania	Australia	Capital Terr	Q3
PI279845	FRIJOL YORIMUMI	Latin America	Mexico		Q2
PI291094	TVu 1978	Latin America	Argentina		Q3
PI291139	MALALBAR	Oceania	Australia	Capital Terr	Q3
PI291140	NEGRO	Oceania	Australia	Capital Terr	Q3
PI291384	No.276	East Asia	China	Liaoning	Q1
PI292871	TVu 2459	Central West Asia	Israel		Q1
PI292889	TVu 1909	South Africa	South Africa		Q2
PI292890	51-C-57	South Africa	South Africa		Q2
PI292891	TVu 2463	South Africa	South Africa		Q2
PI292892	UCR 140	South Africa	South Africa		Q2
PI292893	BECHUANA WHITE	South Africa	South Africa		Q2
PI292897	TVu 1423	Europe	Hungary		Q1
PI292898	TVu 1890	Europe	Hungary		Q1
PI292899	TVu 1596	Europe	Hungary		Q1
PI292901	II V-4-4	Europe	Hungary		Q1
PI292908	TVu 1893	West Africa	Nigeria		Q3
PI292911	C521	India	India		Q1
PI292912	TVu 2483	South Africa	South Africa		Q1
PI292913	TVu 2484	Europe	Hungary		Q1
PI293453	ARLINGTON	North America	US	GA	Q3
PI293455	BLACK	North America	US	GA	Q1
PI293458	BLACKEYE 5	North America	US	GA	Q2
PI293460	BLACKEYE 72	North America	US	GA	Q1Q2
PI293461	BLACKEYE 1239	North America	US	GA	Q2
PI293466	BRABHAM	North America	US	GA	Q1
PI293467	BRABHAM K 892	North America	US	GA	Q1
PI293468	BRABHAM VICTOR	North America	US	GA	Q2
PI293469	BROWN CROWDER	North America	US	GA	Q3
PI293470	BROWNEYE CREAM	North America	US	GA	Q1
PI293472	BROWN SUGAR CROWDER	North America	US	GA	Q1
PI293476	CALHOUN CROWDER	North America	US	GA	Q1
PI293477	CALIFORNIA BLACKEYE	North America	US	GA	Q1
PI293479	CALIFORNIA BLACKEYE 7	North America	US	GA	Q2
PI293480	CALVA	North America	US	GA	Q1
PI293482	CHINESE RED	North America	US	GA	Q1
PI293486	CLAY-BROWN 1330	North America	US	GA	Q3
PI293487	CLAY-BUFF	North America	US	GA	Q3
PI293488	CLAY-BUFF 993	North America	US	GA	Q3
PI293489	CLAY-BUFF 1331	North America	US	GA	Q2Q3
PI293490	CLAY K 713	North America	US	GA	Q2
PI293491	COLUMBIA	North America	US	GA	Q1
PI293500	DIXIE LEE	North America	US	GA	Q1
PI293505	EARLY RAMSHORN BLACKEYE	North America	US	GA	Q1
PI293506	EARLY RED	North America	US	GA	Q3
PI293507	EARLY RED K 736	North America	US	GA	Q1
PI293508	EARLY SILVER CROWDER	North America	US	GA	Q3
PI293512	GIANT BLACKEYE	North America	US	GA	Q2
PI293514	GROIT	North America	US	GA	Q3
PI293517	HOLSTEIN	North America	US	GA	Q1
PI293520	IRON	North America	US	GA	Q1
PI293525	JACKSON PURPLEHULL	North America	US	GA	Q2
PI293526	KOREAN CROWDER	North America	US	GA	Q3
PI293528	KUROMANDARA	North America	US	GA	Q2
PI293531	LARGE BLACK	North America	US	GA	Q1
PI293532	LARGE VIRGINIA BLACKEYE	North America	US	GA	Q1
PI293537	NEW ERA	North America	US	GA	Q1
PI293543	PARAGUAY 6	North America	US	GA	Q3
PI293544	PARAGUAY 10	North America	US	GA	Q3
PI293545	PARAGUAY 12	North America	US	GA	Q3
PI293547	POTOMAC	North America	US	GA	Q2
PI293555	PHS 84801	North America	US	GA	Q1
PI293557	RED COWPEA	North America	US	GA	Q1
PI293558	RED RIPPER	North America	US	GA	Q1
PI293559	RED RIPPER K 711	North America	US	GA	Q1
PI293565	SHIRO	North America	US	GA	Q1
PI293570	SPECKLED PURPLEHULL	North America	US	GA	Q1
PI293572	SUMPTUOUS	North America	US	GA	Q1
PI293573	TAYLOR	North America	US	GA	Q1
PI293575	TEXAS CREAM 10	North America	US	GA	Q1
PI293581	VICTOR	North America	US	GA	Q1
PI293582	VICTOR K 798	North America	US	GA	Q3
PI293583	VIRGINIA BLACKEYE	North America	US	GA	Q1
PI293584	WHIPPOORWILL	North America	US	GA	Q3
PI293587	WILT RESISTANT CHINESE RED	North America	US	GA	Q2
PI300173	BECHUANALAND WHITE	South Africa	South Africa		Q3
PI300175	SAUNDERS UPRIGHT	South Africa	South Africa		Q2
PI304150	TVu 1387	Latin America	Nicaragua		Q3
PI304164	A-269	Latin America	Honduras		Q3
PI305076	9	East Asia	Thailand		Q2
PI307556	F.C. 31660	North America	US	GA	Q1
PI307558	UCR 152	North America	US	GA	Q1
PI307561	PURPLE HULL	North America	US	GA	Q1
PI311226	20970	Latin America	Guatemala		Q1
PI312203	FRIJOL DE CASTILLA	Latin America	Mexico	Chiapas	Q2
PI312207	FRIJOL BAYO	Latin America	Mexico	Sonora	Q1
PI312208	FRIJOL BAYITO	Latin America	Mexico	Sonora	Q2
PI312210	BAYITO CHIQUITO	Latin America	Mexico	Sonora	Q2
PI325775	TVu 1863	Latin America	LesCayes	Haiti	Q2
PI326157	TVu 1864	Central East Africa	Uganda		Q1
PI326161	TVu 1804	Central East Africa	Uganda		Q3
PI337506	TVu 1390	Latin America	Brazil	RioGrandedoSul	Q1
PI339563	C2-576	Oceania	Australia		Q3
PI339565	51C 295	South Africa	Botswana		Q1
PI339572	SEKGALO	South Africa	Botswana		Q3
PI339573	TVu 1805	South Africa	Botswana		Q1
PI339587	TVu 1924	South Africa	South Africa		Q1
PI339588	TVu 1937	South Africa	South Africa		Q2
PI339591	TVu 2655	South Africa	South Africa		Q2
PI339592	TVu 2656	South Africa	South Africa		Q2
PI339595	TVu 2658	South Africa	South Africa		Q2
PI339596	TVu 1911	South Africa	South Africa		Q1
PI339597	TVu 1908	South Africa	South Africa		Q2
PI339598	BETCHWANA WHITE	South Africa	South Africa		Q3
PI339599	EARLY BROWN EYE	South Africa	South Africa		Q2
PI339600	EMBU BUFF	South Africa	South Africa		Q3
PI339603	PALE GREEN	South Africa	South Africa		Q3
PI339605	SAUNDERS UPRIGHT	South Africa	South Africa		Q1
PI339609	TVu 1645	Central East Africa	Tanzania		Q1
PI339610	TVu 1972	Central East Africa	Tanzania		Q1
PI339613	TVu 2003	Central East Africa	Tanzania		Q3
PI339638	TVu 1395	Central East Africa	Uganda		Q3
PI339709	VICTOR	Latin America	Argentina	Corrientes	Q3
PI349674	ALOOMBA	Oceania	Australia	Queensland	Q3
PI349675	MULGRAVE	Oceania	Australia	Queensland	Q3
PI349852	PYRAMID	Oceania	Australia	Queensland	Q3
PI352762	CURUGINHA	Latin America	Brazil	Paraiba	Q1
PI352765	19	Latin America	Brazil	Paraiba	Q1
PI352770	CARRAPICHO	Latin America	Brazil	Ceara	Q1
PI352853	TVu 2706	India	India	Mercara	Q1
PI352854	LOBIA 13	India	India	Uttar Pradesh	Q3
PI352879	TVu 2731	India	India	Uttar Pradesh	Q1
PI352880	T2	India	India	Uttar Pradesh	Q3
PI352881	I.C. 2809	India	India	WestBengal	Q3
PI352893	EARLY RED	India	India	Maharashtra	Q1
PI352905	UCR 1340	India	India	Haryana	Q3
PI352907	TVu 2757	India	India	Haryana	Q3
PI352915	No.21	India	India	Haryana	Q3
PI352919	No.16	India	India	Haryana	Q3
PI352926	TVu 11578	India	India	Haryana	Q3
PI352935	TVu 2785	India	India	Haryana	Q1
PI352936	TVu 2786	India	India	Haryana	Q2
PI352941	No.56	India	India	Haryana	Q3
PI352946	TVu 1429	India	India	Haryana	Q3
PI352956	TVu 2806	India	India	Gujarat	Q3
PI352957	TVu 2807	India	India	Gujarat	Q1
PI352972	I.C. 3008	India	India	Kerala	Q1
PI352979	TVu 2828	India	India	Punjab	Q2
PI352997	TVu 2844	India	India	Lakhawad	Q1
PI353001	TVu 2848	India	India	Kerala	Q1
PI353004	TVu 2851	India	India	Madras	Q1
PI353006	TVu 2853	India	India	TamilNadu	Q2
PI353007	T1	India	India	Uttar Pradesh	Q1
PI353017	TVu 2864	India	India	Chaura	Q2
PI353024	TVu 2870	India	India	HimachalPradesh	Q3
PI353040	TVu 2886	India	India	Maharashtra	Q1
PI353045	TVu 2891	India	India	Gujarat	Q2
PI353057	TVu 2903	India	India	Gujarat	Q3
PI353059	TVu 2905	India	India	Rajasthan	Q3
PI353074	PI353074	India	India		Q3
PI353088	TVu 2933	India	India	Bihar	Q3
PI353089	TVu 2934	India	India	Bihar	Q1
PI353094	TVu 2939	India	India	Maharashtra	Q3
PI353106	TVu 2951	India	India	Himachal Pradesh	Q1
PI353125	TVu 2969	India	India	Himachal Pradesh	Q2
PI353215	TVu 3054	India	India	Gujarat	Q2
PI353236	TVu 3073	India	India	Gujarat	Q2
PI353265	TVu 3099	India	India	Himachal Pradesh	Q2
PI353270	PLL 263	India	India		Q3
PI353272	PLL 263B	India	India		Q1
PI353278	PI353278	India	India		Q1
PI353289	PLL 282	India	India	Dabra	Q3
PI354450	TVu 3234	India	India		Q3
PI354451	P 614	India	India		Q3
PI354466	P 636	India	India		Q3
PI354469	P 640	India	India		Q3
PI354484	P 659	India	India		Q3
PI354488	P 664	India	India		Q3
PI354489	P 666	India	India		Q1Q2Q3
PI354495	P 673	India	India		Q1
PI354499	P 677	India	India		Q3
PI354500	TVu 3279	India	India		Q3
PI354516	P 695	India	India		Q3
PI354517	P 696	India	India		Q3
PI354518	TVu 3296	India	India		Q3
PI354519	P 698	India	India		Q1Q3
PI354521	P 700	India	India		Q3
PI354523	P 702	India	India		Q1
PI354524	P 703	India	India		Q3
PI354525	P 704	India	India		Q3
PI354531	P 710	India	India		Q1
PI354532	P 711	India	India		Q1Q3
PI354542	P 721	India	India		Q3
PI354553	P 734	India	India		Q3
PI354555	P 736	India	India		Q1
PI354556	P 737	India	India		Q2
PI354583	P 773	India	India		Q3
PI354635	P 843	India	India		Q1
PI354664	P 1115	India	India		Q3
PI354666	P 1118	India	India		Q3
PI354667	P 1120	India	India		Q3
PI354668	P 1121	India	India		Q3
PI354685	P 1146	India	India		Q3
PI354686	TVu 3428	India	India		Q3
PI354687	P 1150	India	India		Q3
PI354694	P 1159	India	India		Q3
PI354699	P 1164	India	India		Q2
PI354700	P 1171	India	India		Q1
PI354708	P 1179	India	India		Q3
PI354715	TVu 3444	India	India		Q1Q2Q3
PI354729	P 1208	India	India		Q1
PI354740	P 1220	India	India		Q3
PI354744	P 1225	India	India		Q3
PI354748	P 1240	India	India		Q2Q3
PI354760	P 1257	India	India		Q3
PI354762	P 1260	India	India		Q3
PI354767	PI354767	India	India		Q3
PI354774	P 1273	India	India		Q1Q3
PI354782	P 1285	India	India		Q1
PI354783	P 1286	India	India		Q3
PI354786	P 1291	India	India		Q3
PI354787	P 1292	India	India		Q2Q3
PI354791	P 1297	India	India		Q3
PI354794	P 1301	India	India		Q1
PI354795	P 1302	India	India		Q3
PI354799	P 1306	India	India		Q1
PI354800	P 1307	India	India		Q3
PI354801	P 1308	India	India		Q3
PI354805	P 1312	India	India		Q3
PI354816	P 1328	India	India		Q3
PI354818	P 1331	India	India		Q1
PI354821	P 1335	India	India		Q3
PI354822	P 1336	India	India		Q3
PI354823	P 1337	India	India		Q3
PI354827	P 1343	India	India		Q1Q3
PI354832	P 1350	India	India		Q3
PI354833	P 1351	India	India		Q3
PI354837	P 1356	India	India		Q3
PI354838	P 1357	India	India		Q3
PI354840	P 1359	India	India		Q3
PI354842	P 1361	India	India		Q2
PI354843	P 1362	India	India		Q1
PI354845	P 1364	India	India		Q1
PI354852	P 1374	India	India		Q1
PI354854	P 1376	India	India		Q1Q3
PI354855	P 1379	India	India		Q3
PI354857	TVu 3552	India	India		Q1
PI354859	P 1386	India	India		Q1
PI354860	P 1387	India	India		Q1
PI354861	P 1388	India	India		Q3
PI354863	P 1390	India	India		Q3
PI354864	P 1392	India	India		Q3
PI354865	P 1393	India	India		Q3
PI354869	P 1399	India	India		Q3
PI354877	P 1415	India	India		Q1
PI354878	P 1416	India	India		Q3
PI354881	P 1421	India	India		Q3
PI354883	P 1426	India	India		Q1Q2Q3
PI358716	22905	Central East Africa	Ethiopia	Shewa	Q1
PI367860	UCR 1344	India	India	Coimbatore Madras State	Q1
PI367861	V. 67-02	India	India		Q1
PI367862	V. 67-03	India	India		Q1
PI367863	V. 67-05	India	India		Q1
PI367869	V. 69-01	India	India		Q3
PI367918	CALOONA	Oceania	Australia		Q2
PI367920	SARI NO. 3	South Africa	Mozambique		Q1
PI367921	NAVAJA	South Africa	Mozambique		Q3
PI367923	DAY SPECKLED	South Africa	Mozambique		Q3
PI367925	WHIPPOOWILL	South Africa	Mozambique		Q1
PI367927	DR. SAUNDERS	South Africa	Mozambique		Q1
PI382087	KAFINSOLI LOCAL	West Africa	Nigeria		Q2Q3
PI382088	KANO BLUE	West Africa	Nigeria		Q1
PI382103	WC BLISS	West Africa	Nigeria		Q1
PI382107	588/2	West Africa	Nigeria		Q3
PI382110	BPL-4	West Africa	Nigeria		Q3
PI382111	H1 O/C-1	West Africa	Nigeria		Q1
PI382114	H27-8	West Africa	Nigeria		Q1
PI382121	H51-1	West Africa	Nigeria		Q2
PI382124	H64-8	West Africa	Nigeria		Q2
PI382125	H79 1	West Africa	Nigeria		Q2
PI382128	H113-2-1	West Africa	Nigeria		Q1
PI382129	H113-4	West Africa	Nigeria		Q2
PI382130	H114-3	West Africa	Nigeria		Q2
PI382131	H121-1	West Africa	Nigeria		Q1
PI382133	H128-1	West Africa	Nigeria		Q2
PI382135	H144-4	West Africa	Nigeria		Q2
PI382137	H299-1	West Africa	Nigeria		Q1
PI382138	H299 2	West Africa	Nigeria		Q1
PI390420	W-C 965	Latin America	Colombia		Q1
PI390831	Chiclayo Pardo	Latin America	Peru		Q1
PI391658	SHE-PAI-TOU	East Asia	China	Beijing	Q1
PI406284	TVu 57	West Africa	Nigeria		Q1
PI406286	TVu 317	North America	US	GA	Q2
PI406291	IFH 299-5	West Africa	Nigeria		Q2
PI406293	IFH 62-1-1	West Africa	Nigeria		Q1
PI419005	PI419005	East Asia	China		Q2
PI419102	PI419102	East Asia	China	Beijing	Q2
PI419165	PI419165	East Asia	China		Q2
PI430687	HUA PI CHIA CHIANG TOU	East Asia	China	Beijing	Q2
PI447582	TVu 3834	West Africa	Nigeria	Oyo	Q2
PI448060	TVu 4717	West Africa	Niger		Q1
PI448112	TVu 4776	West Africa	Niger		Q2
PI448427	TVu 5115	West Africa	Niger		Q2
PI448499	TVu 5247	West Africa	Niger		Q1
PI448558	TVu 5315	West Africa	Niger		Q2
PI448600	TVu 5372	West Africa	Niger		Q2
PI448702	TVu 5493	West Africa	Niger		Q2
PI448760	TVu 5560	West Africa	Niger		Q2
PI448806	TVu 5616	West Africa	Niger		Q2
PI468104	PRT 4	Latin America	Suriname		Q2
PI470274	DB 26	East Asia	Indonesia		Q2
PI478622	62-153-00052	Central West Asia	Turkey		Q1
PI487493	PI487493	East Asia	China		Q2
PI487518	Bogor 1	East Asia	Indonesia		Q2
PI487523	Tianong's 5	East Asia	China		Q2
PI487527	K-30	North America	US	GA	Q1
PI487532	Huang Hua Qing Ai Jiang Dou	East Asia	Indonesia		Q1Q2Q3
PI490770	Huang Hua Qing Ai Jiang Dou	East Asia	China		Q2
PI491193	Borulce	Central West Asia	Turkey		Q2
PI503326	PI503326	Central West Asia	Turkey		Q1
PI503328	280785-0604	Central West Asia	Turkey	Canakkale	Q1
PI527259	AMM 338	South Africa	Zimbabwe		Q3
PI527263	AMM 563	South Africa	Zimbabwe		Q3
PI527289	AMM 923	South Africa	Zimbabwe		Q1
PI527299	AMM 1083	South Africa	Zimbabwe		Q2
PI527302	AMM 1208	South Africa	Zimbabwe		Q3
PI527561	IZ 29	West Africa	Burundi		Q3
PI527563	IZ 37	West Africa	Burundi		Q1
PI527675	IZ 316	Central East Africa	Zaire		Q3
PI578898	Grif 968	East Asia	China		Q2
PI578902	CHANG XIAN JIANG DOU	East Asia	China		Q1
PI578907	HEI ZI DANG DI JIANG DOU	East Asia	China		Q2
PI578911	TAO GAN JIANG DOU	East Asia	China		Q1
PI580978	TVu 11659	West Africa	Nigeria		Q1
PI582322	UCR 52	West Africa	Burkina Faso		Q1
PI582340	PARAGUAY 1	North America	US	CA	Q1
PI582343	CPI 77123	East Asia	Former Soviet Union		Q2
PI582344	CPI 77122	East Asia	Former Soviet Union		Q2
PI582354	MULLER 17G	North America	US	CA	Q2
PI582366	UCR 191	India	India		Q1
PI582368	UCR 193	India	India		Q2
PI582415	GAMUSA	Latin America	Mexico		Q1
PI582416	MALU	Latin America	Mexico		Q2
PI582417	REATA	Latin America	Mexico		Q2
PI582419	KVu 69	West Africa	Burkina Faso		Q2
PI582420	BUSH 1	North America	US	CA	Q2
PI582421	BUSH 2	North America	US	CA	Q2
PI582422	BUSH 3	North America	US	CA	Q1
PI582425	BUSH 7	North America	US	CA	Q1
PI582428	LAURA B	Latin America	Trinidad and Tobago		Q2
PI582465	UCR 342	Latin America	Mexico		Q2
PI582468	UCR 347	North America	US	CA	Q1
PI582469	UCR 350	East Asia	Philippines		Q2
PI582470	UCR 356	South Africa	Botswana		Q2
PI582471	UCR 360	South Africa	Botswana		Q2
PI582472	UCR 364	South Africa	Botswana		Q2
PI582474	UCR 381	South Africa	Botswana		Q2
PI582521	YETTOROJ	Latin America	Mexico		Q1
PI582522	FRIJOL SARABANDO	Latin America	Mexico		Q2
PI582523	FRIJOL TORITO	Latin America	Mexico		Q1
PI582524	SAK XPELON	Latin America	Mexico		Q1
PI582525	GUILIN CHINH	East Asia	China		Q2
PI582530	SAMBRIZIE	West Africa	Ghana	Kokoansi	Q2
PI582541	TVu 2623	Latin America	Mexico		Q1
PI582542	TVu 2623	Latin America	Mexico		Q2
PI582551	UCR 1004	South Africa	Botswana		Q2
PI582565	UCR 500	India	India		Q1
PI582566	PUSA DOFASLI	India	India		Q1
PI582567	UCR 504	India	India		Q2
PI582569	UCR 508	India	India		Q2
PI582571	UCR 518	South Africa	Botswana		Q2
PI582572	KVu 1-P1	Central East Africa	Kenya		Q2
PI582574	KVu 24-P3	Central East Africa	Kenya		Q3
PI582575	KVu 26	Central East Africa	Kenya		Q2
PI582578	KVu 56 CRN	Central East Africa	Kenya		Q1
PI582579	KVu 57	Central East Africa	Kenya		Q1
PI582581	KVu 64	Central East Africa	Kenya		Q1
PI582650	UCR 729	South Africa	Botswana		Q1
PI582665	UCR 1016	South Africa	Botswana		Q3
PI582666	UCR 1019	South Africa	Botswana		Q2
PI582667	UCR 1021	South Africa	Botswana		Q3
PI582668	UCR 1022	South Africa	Botswana		Q1Q2Q3
PI582669	UCR 1024	South Africa	Botswana		Q1Q3
PI582670	UCR 1025	South Africa	Botswana		Q2
PI582671	UCR 1026	South Africa	Botswana		Q1
PI582672	UCR 1027	South Africa	Botswana		Q3
PI582675	UCR 1030	South Africa	Botswana		Q2
PI582676	UCR 1035	South Africa	Botswana		Q2
PI582677	UCR 1037	South Africa	Botswana		Q2
PI582679	UCR 1041	South Africa	Botswana		Q3
PI582680	UCR 1043	South Africa	Botswana		Q1
PI582681	UCR 1044	South Africa	Botswana		Q2
PI582696	UCR 1159	South Africa	Botswana		Q1Q2
PI582697	UCR 1176	South Africa	Botswana		Q3
PI582699	UCR 1193	South Africa	Botswana		Q1Q2
PI582700	UCR 1195	South Africa	Botswana		Q1
PI582701	UCR 1203	South Africa	Botswana		Q3
PI582702	UCR 1204	South Africa	Botswana		Q2
PI582704	UCR 1211	South Africa	Botswana		Q3
PI582705	UCR 1220	South Africa	Botswana		Q3
PI582707	UCR 1228	South Africa	Botswana		Q3
PI582708	UCR 1231	South Africa	Botswana		Q3
PI582709	UCR 1232	South Africa	Botswana		Q1
PI582718	UCR 1242	South Africa	Botswana		Q3
PI582724	UCR 1261	South Africa	Botswana		Q1Q2Q3
PI582725	UCR 1263	South Africa	Botswana		Q2
PI582727	UCR 1266	South Africa	Botswana		Q1Q3
PI582728	UCR 1267	South Africa	Botswana		Q2
PI582729	PI582729	South Africa	Botswana		Q2
PI582730	UCR 1270	South Africa	Botswana		Q1
PI582731	UCR 1273	South Africa	Botswana		Q1Q2Q3
PI582732	UCR 1274	South Africa	Botswana		Q2
PI582733	UCR 1275	South Africa	Botswana		Q1
PI582734	UCR 1278	South Africa	Botswana		Q2
PI582735	UCR 1280	South Africa	Botswana		Q2Q3
PI582736	UCR 1283	South Africa	Botswana		Q2
PI582738	UCR 1290	South Africa	Botswana		Q1
PI582740	UCR 1292	South Africa	Botswana		Q3
PI582785	KVu 479	Central East Africa	Kenya		Q1
PI582789	KVu 510-1	Central East Africa	Kenya		Q1
PI582793	KVu HB 3-4-1	Central East Africa	Kenya		Q3
PI582805	UCR 763	South Africa	Botswana		Q3
PI582809	UCR 772	South Africa	Botswana		Q3
PI582810	UCR 790	South Africa	Botswana		Q2
PI582812	UCR 794	South Africa	Botswana		Q1
PI582813	UCR 796	South Africa	Botswana		Q2
PI582814	UCR 799	South Africa	Botswana		Q2
PI582815	UCR 804	South Africa	Botswana		Q2
PI582817	UCR 809	South Africa	Botswana		Q2
PI582818	UCR 818	South Africa	Botswana		Q2
PI582819	UCR 825	South Africa	Botswana		Q2
PI582820	UCR 827	South Africa	Botswana		Q2
PI582821	UCR 830	South Africa	Botswana		Q2
PI582822	UCR 831	South Africa	Botswana		Q3
PI582823	UCR 832	South Africa	Botswana		Q1Q3
PI582825	UCR 839	South Africa	Botswana		Q3
PI582826	UCR 846	South Africa	Botswana		Q2
PI582850	UCR 927	South Africa	Botswana		Q1
PI582851	UCR 929	South Africa	Botswana		Q1
PI582852	UCR 935	South Africa	Botswana		Q3
PI582853	UCR 941	South Africa	Botswana		Q2
PI582854	UCR 945	South Africa	Botswana		Q2
PI582855	UCR 947	South Africa	Botswana		Q2
PI582857	UCR 954	South Africa	Botswana		Q2Q3
PI582859	UCR 967	South Africa	Botswana		Q2
PI582860	UCR 968	South Africa	Botswana		Q2
PI582861	UCR 1003	South Africa	Botswana		Q1
PI582862	UCR 1007	South Africa	Botswana		Q1Q3
PI582864	UCR 1018	South Africa	Botswana		Q2
PI582865	UCR 1031	South Africa	Botswana		Q3
PI582866	UCR 1032	South Africa	Botswana		Q2
PI582867	UCR 1034	South Africa	Botswana		Q2
PI582868	UCR 1051	South Africa	Botswana		Q2
PI582869	UCR 1052	South Africa	Botswana		Q2
PI582870	PI582870	South Africa	Botswana		Q3
PI582871	UCR 1058	South Africa	Botswana		Q3
PI582873	UCR 1086	South Africa	Botswana		Q3
PI582874	UCR 1087	South Africa	Botswana		Q3
PI582875	UCR 1089	South Africa	Botswana		Q3
PI582876	UCR 1090	South Africa	Botswana		Q3
PI582879	UCR 1115	South Africa	Botswana		Q1
PI582880	UCR 1118	South Africa	Botswana		Q3
PI582881	UCR 1126	South Africa	Botswana		Q2
PI582894	UCR 1180	South Africa	Botswana		Q2
PI582912	KVu 390-3	Central East Africa	Kenya		Q1
PI582913	UCR 2529	West Africa	Senegal		Q2
PI582922	UCR 53	West Africa	Burkina Faso		Q1
PI582923	BAMBEY 31	West Africa	Senegal		Q2
PI582924	BAMBEY 28	West Africa	Senegal		Q1
PI582930	UCR 171	Latin America	Mexico		Q1
PI582932	UCR 174	South Africa	Malawi		Q3
PI582934	VITA 7	West Africa	Burkina Faso		Q2
PI582936	UCR 227	West Africa	Nigeria		Q3
PI582941	UCR 353	Latin America	Puerto Rico		Q3
PI582942	UCR 354	Latin America	Puerto Rico		Q1
PI582943	UCR 355	Latin America	Puerto Rico		Q2
PI582949	XPELON	Latin America	Mexico		Q2
PI582951	CAMEROON-2	West Africa	Cameroon		Q2
PI582952	UCR 452	West Africa	Nigeria		Q2
PI582959	UCR 474	West Africa	Nigeria		Q1
PI582965	UCR 480	West Africa	Nigeria		Q1
PI582970	Vuli-2	West Africa	Nigeria		Q1
PI582980	KVu 439 B	Central East Africa	Kenya		Q2
PI582984	KVu 447	Central East Africa	Kenya		Q2
PI583007	UCR 744	South Africa	Botswana		Q2
PI583051	UCR 900	South Africa	Botswana		Q2
PI583068	UCR 965	South Africa	Botswana		Q2
PI583076	UCR 2580	West Africa	Cameroon		Q2
PI583096	TOULOUM 01	West Africa	Cameroon		Q2
PI583098	UCR 2617	West Africa	Cameroon		Q2
PI583100	UCR 2620	West Africa	Cameroon		Q2
PI583102	UCR 2623	West Africa	Cameroon		Q2
PI583104	UCR 2625	West Africa	Cameroon		Q2
PI583106	UCR 2627	West Africa	Cameroon		Q1
PI583108	UCR 2631	West Africa	Cameroon		Q1
PI583110	UCR 2634	West Africa	Cameroon		Q2
PI583154	UCR 2695	West Africa	Cameroon		Q2
PI583156	UCR 2698	West Africa	Cameroon		Q2
PI583160	UCR 2702	West Africa	Cameroon		Q2
PI583164	UCR 2708	West Africa	Cameroon		Q2
PI583167	UCR 2713	West Africa	Cameroon		Q1Q2Q3
PI583170	UCR 2716	West Africa	Cameroon		Q1
PI583174	UCR 2722	West Africa	Cameroon		Q1
PI583182	UCR 2742	Europe	Portugal		Q1
PI583185	UCR 3294	West Africa	Senegal		Q2
PI583186	UCR 3306	West Africa	Senegal		Q2
PI583187	UCR 3310	West Africa	Senegal		Q2
PI583188	UCR 3313	West Africa	Senegal		Q2
PI583189	UCR 3315	West Africa	Senegal		Q2
PI583190	UCR 3316	West Africa	Senegal		Q2
PI583191	UCR 3326	West Africa	Senegal		Q2
PI583192	UCR 3332	West Africa	Senegal		Q2
PI583193	UCR 3334	West Africa	Senegal		Q3
PI583194	UCR 3335	West Africa	Senegal		Q1
PI583195	UCR 3338	West Africa	Senegal		Q2
PI583197	UCR 3345	West Africa	Senegal		Q1
PI583198	UCR 3349	West Africa	Senegal		Q1
PI583199	UCR 3367	West Africa	Senegal		Q1
PI583200	UCR 3372	West Africa	Senegal		Q1
PI583201	UCR 3373	West Africa	Senegal		Q1
PI583202	UCR 3374	West Africa	Senegal		Q1
PI583203	UCR 3376	West Africa	Senegal		Q1
PI583204	UCR 3378	West Africa	Senegal		Q1
PI583205	UCR 3379	West Africa	Senegal		Q1
PI583207	UCR 3383	West Africa	Senegal		Q1
PI583209	TVu 2503	West Africa	Nigeria		Q1
PI583219	UCR 3285	West Africa	Senegal		Q2
PI583220	UCR 3286	West Africa	Senegal		Q1
PI583238	UCR 3339	West Africa	Senegal		Q1
PI583242	UCR 3358	West Africa	Senegal		Q1
PI583253	UCR 3381	West Africa	Senegal		Q2
PI663005	ALA BROWNEYE	North America	US	AL	Q1
PI663014	CHAMPION	North America	US	TX	Q2
PI663015	BLACKEYE PRINCESS ANNE	North America	US	VA	Q2
PI663030	KNUCKLE PURPLE HULL CROWDER	North America	US	GA	Q2Q3
PI663059	TEXAS PURPLE HULL 49	North America	US	GA	Q2
PI663101	GIANT BLACKEYE	North America	US	GA	Q2
PI663140	DIXIECREAM	North America	US	GA	Q2
PI663148	MAGNOLIA BLACKEYE	American Cultivar	US	MS	Q2
PI663150	CORONET	North America	US	GA	Q2
PI663151	Carolina Cream	American Cultivar	US	SC	Q3
PI664513	Santee Early Pinkeye	American Cultivar	US	SC	Q1
PI664514	Kiawah	American Cultivar	US	SC	Q1
PI664515	Bettergreen	American Cultivar	US	SC	Q1
PI664516	Carolina Crowder	American Cultivar	US	SC	Q3
PI664517	Bettergro Blackeye	American Cultivar	US	SC	Q2
PI664518	Bettersnap	American Cultivar	US	SC	Q1
PI664519	Tender Cream	American Cultivar	US	SC	Q1
PI664524	Green Dixie Blackeye	American Cultivar	US	SC	Q1
PI664534	COLOSSUS-80	American Cultivar	US	SC	Q2
PI666249	Colossus	American Cultivar	US	SC	Q1
PI666251	PI666251	American Cultivar	US	GA	Q2
PI666252	Worthmore	American Cultivar	US	GA	Q3
PI666253	Elite	American Cultivar	US	AR	Q2
PI666260	Corona	American Cultivar	US	GA	Q1
PI666262	Early Pinkeye	American Cultivar	US	GA	Q2
PI666264	AUbe	American Cultivar	US	AL	Q1
PI666265	Royal Blackeye	American Cultivar	US	LA	Q2
PI666266	Arkansas Blackeye No. 1	American Cultivar	US	AR	Q2
PI666267	Early Acre	American Cultivar	US	AR	Q1
PI666269	Pickworth Pinkeye	American Cultivar	US	AL	Q2
1Three population structures (Clusters) identified from Mega 5: Q1 means the cowpea accession belongs to the population group1; Q2 to group2; Q3 to group3; and Q1Q2,Q1Q2Q3,Q1Q3 and Q2Q3 to admixures.
